# Supplementary material for: Satisfaction with Teleophthalmology Services: Insights from Remote Areas of Taiwan
Source: MDPI journal article supplement (doi:10.3390/healthcare12080818), 2024-04-11
Supplement: s1 [file s1]

Table S1. Questionnaire of satisfaction survey for patients.

| Question                                                                                                                                                                       | Construct |
|--------------------------------------------------------------------------------------------------------------------------------------------------------------------------------|-----------|
| Q1. I agree that the teleophthalmology service saved time and the traffic expense for accessing medical care.                                                                  | D1        |
| Q2. The time for examination and consulting during teleophthalmology service is reasonable.                                                                                    | D1        |
| Q3. The examination of visual acuity, intraocular pressure, and fundus photography provided by the teleophthalmology service can help me understand the conditions of my eyes. | D2        |
| Q4. I am satisfied with the explanation given by the eye care specialist.                                                                                                      | D2        |
| Q5. The eye care specialist arranged appropriate appointments and referral services.                                                                                           | D3        |
| Q6. The medical staff treated me in a friendly manner.                                                                                                                         | D3        |
| Q7. The medical staff was enthusiastic about communicating with the patients.                                                                                                  | D3        |
| Q8. I agree that the teleophthalmology service provides me with appropriate medical care.                                                                                      | D2        |
| Q9. Teleophthalmology is beneficial to the treatment of my illness.                                                                                                            | D2        |
| Q10. I would continue to utilize teleophthalmology services.                                                                                                                   | D4        |
| Q11. I would recommend teleophthalmology services to my family and friends.                                                                                                    | D4        |
| Q12. I consider the voice and visual quality of the teleophthalmology equipment acceptable.                                                                                    | D5        |
| Q13. I agree that videoconferencing utilization made communicating with the eye care specialist comprehensive.                                                                 | D3        |
| Q14. I think that teleophthalmology consulting is equivalent to a face-to-face appointment.                                                                                    | D5        |
| Q15. I am satisfied with the overall quality provided by the teleophthalmology service.                                                                                        | D4        |

D1, Financial aspects of care; D2, Quality of medical care; D3, Quality of service; D4, Supportive attitude toward the project; D5, Quality of telecommunication.
