# Supplementary material for: Satisfaction with Teleophthalmology Services: Insights from Remote Areas of Taiwan
Source: MDPI journal article supplement (doi:10.3390/healthcare12080818), 2024-04-11
Supplement: s1 [file s1]

Table S3. Comparison of satisfaction scores between two groups of patients.

| Variables                                            | Group 1   | Group 2   | Total     | P-value |
|------------------------------------------------------|-----------|-----------|-----------|---------|
| N                                                    | 104       | 77        | 181       |         |
| <b>Satisfaction (maximum score is 5)<sup>a</sup></b> |           |           |           |         |
| Financial aspects of care (D1)                       | 4.44±0.56 | 4.53±0.56 | 4.48±0.56 | 0.289   |
| Quality of medical care (D2)                         | 4.48±0.50 | 4.53±0.49 | 4.50±0.49 | 0.521   |
| Quality of service (D3)                              | 4.42±0.36 | 4.37±0.37 | 4.40±0.37 | 0.416   |
| Supportive attitude toward the program (D4)          | 4.46±0.64 | 4.48±0.59 | 4.47±0.62 | 0.849   |
| Quality of telecommunication (D5)                    | 4.40±0.55 | 4.39±0.55 | 4.40±0.55 | 0.863   |

Data are presented as mean ± standard deviation.

\*p-value<0.05 was considered statistically significant after test. <sup>a</sup> independent t test

Group 1: Chishang or Guanshan counties; Group 2: Haiduan or Luye or Darren counties
