# Supplementary material for: Satisfaction with Teleophthalmology Services: Insights from Remote Areas of Taiwan
Source: MDPI journal article supplement (doi:10.3390/healthcare12080818), 2024-04-11
Supplement: s1 [file s1]

Table S4. Comparison of satisfaction scores between two groups of healthcare providers.

| Variables                                            | Group 1   | Group 2   | Total     | P-value |
|------------------------------------------------------|-----------|-----------|-----------|---------|
| N                                                    | 11        | 14        | 25        |         |
| <b>Satisfaction (maximum score is 5)<sup>a</sup></b> |           |           |           |         |
| User-friendliness of the instruments (D1)            | 4.14±0.98 | 3.89±0.96 | 4.00±0.96 | 0.539   |
| Quality of medical care (D2)                         | 4.80±0.33 | 4.41±0.59 | 4.58±0.52 | 0.064   |
| Quality of service (D3)                              | 4.79±0.31 | 4.52±0.53 | 4.64±0.46 | 0.159   |
| Supportive attitude toward the program (D4)          | 4.68±0.46 | 4.11±0.84 | 4.36±0.74 | 0.053   |
| Quality of telecommunication (D5)                    | 3.91±0.89 | 4.14±0.74 | 4.04±0.80 | 0.481   |

Data are presented as mean ± standard deviation.

\*p-value<0.05 was considered statistically significant after test. a independent t test

Group 1: Chishang or Guanshan counties; Group 2: Haiduan or Luye or Darren counties
