# Supplementary material for: Satisfaction with Teleophthalmology Services: Insights from Remote Areas of Taiwan
Source: MDPI journal article supplement (doi:10.3390/healthcare12080818), 2024-04-11
Supplement: s1 [file s1]

Table S2. Questionnaire of satisfaction survey for healthcare provides.

| Question                                                                                                                                                                          | Construct |
|-----------------------------------------------------------------------------------------------------------------------------------------------------------------------------------|-----------|
| Q1. The eye doctor provided professional knowledge.                                                                                                                               | D2        |
| Q2. The eye doctor explained the condition clearly to the patient.                                                                                                                | D2        |
| Q3. The eye doctor explained the usage of the medication to the patient well.                                                                                                     | D2        |
| Q4. The eye doctor is enthusiastic about communicating with patients and understanding their condition.                                                                           | D3        |
| Q5. The eye doctor treated patients in a friendly manner.                                                                                                                         | D3        |
| Q6. Teleophthalmology benefits patients.                                                                                                                                          | D3        |
| Q7. The addition of teleophthalmology service does not affect the infirmity routine of preparation.                                                                               | D1        |
| Q8. It is easy to operate the devices and instruments of teleophthalmology.                                                                                                       | D1        |
| Q9. The eye doctor provided appropriate referral suggestions.                                                                                                                     | D3        |
| Q10. The patients are satisfied with the services provided by teleophthalmology.                                                                                                  | D4        |
| Q11. I would recommend teleophthalmology services to my family and friends. There was no disruption of videoconferencing (sounds or images) during the teleophthalmology consult. | D5        |
| Q12. The images and sounds provided by teleophthalmology equipment are appropriate.                                                                                               | D4        |
| Q13. Providing teleophthalmology is a good medical policy.                                                                                                                        | D5        |

D1, User-friendliness of instruments; D2, Quality of medical care; D3, Quality of service; D4, Supportive attitude toward the project; D5, Quality of telecommunication.
