# Supplementary material for: Satisfaction with Teleophthalmology Services: Insights from Remote Areas of Taiwan
Source: Healthcare (Basel). 2024 Apr 11;12(8):818. doi: 10.3390/healthcare12080818 (PMC11050710; doi:10.3390/healthcare12080818)
Supplement: Supplementary file 1 [file healthcare-12-00818-s001.zip]

Archive with 4 entries (4 files):
- Table S1. Questionair for satisfaction of patients.pdf
- Table S2. Questionaire for satisfaction of healthecare providers.pdf
- Table S3.pdf
- Table S4.pdf
